# Supplementary material
Source: ML conference proceedings conference paper supplement (https://proceedings.mlr.press/v54/lian17a.html)
Supplement: Supplementary file [file lian17a-supp.pdf]

## SUPPLEMENTARY MATERIAL

### Proof to Theorem 1

*Proof.* We start from decomposing the expectation of  $\|x_{k+1} - x^*\|^2$ :

$$\begin{aligned}
& \mathbb{E}\|x_{k+1} - x^*\|^2 \\
&= \mathbb{E}\|x_k - x^*\|^2 + \mathbb{E}\|x_{k+1} - x_k\|^2 + 2\mathbb{E}\langle x_{k+1} - x_k, x_k - x^* \rangle \\
&= \mathbb{E}\|x_k - x^*\|^2 + \gamma^2 \mathbb{E} \left\| \left( \partial G_{j_k}(x_k) \right)^\top \nabla F_{i_k}(\hat{G}_k) - \left( \partial G_{j_k}(\tilde{x}) \right)^\top \nabla F_{i_k}(\tilde{G}) + \nabla f(\tilde{x}) \right\|^2 \\
&\quad - 2\gamma \mathbb{E} \left\langle \left( \partial G_{j_k}(x_k) \right)^\top \nabla F_{i_k}(\hat{G}_k) - \left( \partial G_{j_k}(\tilde{x}) \right)^\top \nabla F_{i_k}(\tilde{G}) + \nabla f(\tilde{x}), x_k - x^* \right\rangle. \tag{13}
\end{aligned}$$

Given the observation

$$\begin{aligned}
& \mathbb{E} \left\langle -\left( \partial G_{j_k}(\tilde{x}) \right)^\top \nabla F_{i_k}(\tilde{G}) + \nabla f(\tilde{x}), x_k - x^* \right\rangle \\
&= \mathbb{E} \left\langle -\mathbb{E}_{j_k, i_k} J_{G_{j_k}}^\top(\tilde{x}) \nabla F_{i_k}(\tilde{G}) + \nabla f(\tilde{x}), x_k - x^* \right\rangle \\
&= \mathbb{E} \langle -\nabla f(\tilde{x}) + \nabla f(\tilde{x}), x_k - x^* \rangle \\
&= 0,
\end{aligned}$$

It follows from (13) that

$$\begin{aligned}
\mathbb{E}\|x_{k+1} - x^*\|^2 &= \mathbb{E}\|x_k - x^*\|^2 - 2\gamma \underbrace{\mathbb{E} \left\langle \left( \partial G_{j_k}(x_k) \right)^\top \nabla F_{i_k}(\hat{G}_k), x_k - x^* \right\rangle}_{=:T_1} \\
&\quad + \gamma^2 \underbrace{\mathbb{E} \left\| \left( \partial G_{j_k}(x_k) \right)^\top \nabla F_{i_k}(\hat{G}_k) - \left( \partial G_{j_k}(\tilde{x}) \right)^\top \nabla F_{i_k}(\tilde{G}) + \nabla f(\tilde{x}) \right\|^2}_{=:T_2}. \tag{14}
\end{aligned}$$

We then bound  $T_1$ . From the strong convexity of  $f(x)$  we have the following inequality:

$$\langle \nabla f(x), x - x^* \rangle \geq \mu_f \|x - x^*\|^2. \tag{15}$$

It follows that

$$\begin{aligned}
T_1 &= \mathbb{E} \left\langle \left( \partial G_{j_k}(x_k) \right)^\top \nabla F_{i_k}(\hat{G}_k), x_k - x^* \right\rangle \\
&= \mathbb{E} \left\langle \left( \partial G_{j_k}(x_k) \right)^\top \nabla F_{i_k}(\hat{G}_k) - \nabla f(x_k), x_k - x^* \right\rangle + \mathbb{E} \langle \nabla f(x_k), x_k - x^* \rangle \\
&\stackrel{(15)}{\geq} \underbrace{\mathbb{E} \left\langle \left( \partial G_{j_k}(x_k) \right)^\top \nabla F_{i_k}(\hat{G}_k) - \nabla f(x_k), x_k - x^* \right\rangle}_{=:T_3} + \mathbb{E} \mu_f \|x_k - x^*\|^2. \tag{16}
\end{aligned}$$

We then bound  $T_3$ . Recall that for any  $\alpha > 0$  we have

$$\frac{1}{\alpha} x^2 + \alpha y^2 \geq 2|\langle x, y \rangle| \geq |\langle x, y \rangle|. \tag{17}$$

It follows that

$$T_3 = \mathbb{E} \left\langle \left( \partial G_{j_k}(x_k) \right)^\top \nabla F_{i_k}(\hat{G}_k) - \nabla f(x_k), x_k - x^* \right\rangle$$

$$\begin{aligned}
&= \mathbb{E} \left\langle (\partial G_{j_k}(x_k))^\top \nabla F_{i_k}(\hat{G}_k) - (\partial G_{j_k}(x_k))^\top \nabla F_{i_k}(G(x_k)), x_k - x^* \right\rangle \\
&\stackrel{(17)}{\geq} -\frac{1}{\alpha} \underbrace{\mathbb{E} \left\| (\partial G_{j_k}(x_k))^\top \nabla F_{i_k}(\hat{G}_k) - (\partial G_{j_k}(x_k))^\top \nabla F_{i_k}(G(x_k)) \right\|^2}_{=:T_4} - \alpha \mathbb{E} \|x_k - x^*\|^2, \forall \alpha > 0 \quad (18)
\end{aligned}$$

For  $T_4$ , from the definition of  $\hat{G}_k$ ,

$$\begin{aligned}
T_4 &= \mathbb{E} \left\| (\partial G_{j_k}(x_k))^\top \nabla F_{i_k}(\hat{G}_k) - (\partial G_{j_k}(x_k))^\top \nabla F_{i_k}(G(x_k)) \right\|^2 \\
&= \mathbb{E} \left\| (\partial G_{j_k}(x_k))^\top \nabla F_{i_k} \left( \tilde{G} - \frac{1}{A} \sum_{1 \leq j \leq A} (G_{\mathcal{A}_k[j]}(\tilde{x}) - G_{\mathcal{A}_k[j]}(x_k)) \right) - (\partial G_{j_k}(x_k))^\top \nabla F_{i_k}(G(x_k)) \right\|^2 \\
&\leq \mathbb{E} \left\| (\partial G_{j_k}(x_k))^\top \right\|^2 \left\| \nabla F_{i_k} \left( \tilde{G} - \frac{1}{A} \sum_{1 \leq j \leq A} (G_{\mathcal{A}_k[j]}(\tilde{x}) - G_{\mathcal{A}_k[j]}(x_k)) \right) - \nabla F_{i_k}(G(x_k)) \right\|^2 \\
&\stackrel{(7)}{\leq} B_G^2 \mathbb{E} \left\| \nabla F_{i_k} \left( \tilde{G} - \frac{1}{A} \sum_{1 \leq j \leq A} (G_{\mathcal{A}_k[j]}(\tilde{x}) - G_{\mathcal{A}_k[j]}(x_k)) \right) - \nabla F_{i_k}(G(x_k)) \right\|^2 \\
&\stackrel{(8)}{\leq} B_G^2 L_F^2 \mathbb{E} \left\| \underbrace{\tilde{G} - \frac{1}{A} \sum_{1 \leq j \leq A} (G_{\mathcal{A}_k[j]}(\tilde{x}) - G_{\mathcal{A}_k[j]}(x_k))}_{=:T_0} - G(x_k) \right\|^2. \quad (19)
\end{aligned}$$

Let  $\alpha = \frac{\mu_f}{8}$  in (18) and put the bound of  $T_4$  in it, we obtain

$$\begin{aligned}
T_3 &\stackrel{(18)}{\geq} -\frac{1}{\alpha} T_4 - \alpha \mathbb{E} \|x_k - x^*\|^2 \\
&\stackrel{(19)}{\geq} -\frac{8B_G^2 L_F^2}{\mu_f} T_0 - \frac{\mu_f}{8} \mathbb{E} \|x_k - x^*\|^2. \quad (20)
\end{aligned}$$

Then put this bound on  $T_3$  to (16).

$$\begin{aligned}
T_1 &\stackrel{(16)}{\geq} T_3 + \mathbb{E} \mu_f \|x_k - x^*\|^2 \\
&\stackrel{(20)}{\geq} -\frac{8B_G^2 L_F^2}{\mu_f} T_0 + \frac{7\mu_f}{8} \mathbb{E} \|x_k - x^*\|^2. \quad (21)
\end{aligned}$$

Now we have  $T_1$  bounded. We use this bound to bound the  $T_1$  in the equality (14) at the beginning.

$$\begin{aligned}
\mathbb{E} \|x_{k+1} - x^*\|^2 &\stackrel{(14)}{=} \mathbb{E} \|x_k - x^*\|^2 - 2\gamma T_1 + \gamma^2 T_2 \\
&\stackrel{(21)}{\leq} \mathbb{E} \|x_k - x^*\|^2 - \frac{7\mu_f \gamma}{4} \mathbb{E} \|x_k - x^*\|^2 + \frac{16\gamma B_G^2 L_F^2}{\mu_f} T_0 + \gamma^2 T_2. \quad (22)
\end{aligned}$$

We then bound  $T_2$ . Recall for any  $\beta$  we have

$$\|\beta_1 + \beta_2 + \dots + \beta_t\|^2 \leq t (\|\beta_1\|^2 + \dots + \|\beta_t\|^2), \forall t \in \mathbb{N}_+. \quad (23)$$

From the definition of  $T_2$  in (14) we have the following bound on  $T_2$ :

$$\begin{aligned}
T_2 &= \mathbb{E} \left\| (\partial G_{j_k}(x_k))^\top \nabla F_{i_k}(\hat{G}_k) - (\partial G_{j_k}(\tilde{x}))^\top \nabla F_{i_k}(\tilde{G}) + \nabla f(\tilde{x}) \right\|^2 \\
&\stackrel{(23)}{\leq} 2\mathbb{E} \|\nabla f(\tilde{x})\|^2 + 2\mathbb{E} \left\| (\partial G_{j_k}(x_k))^\top \nabla F_{i_k}(\hat{G}_k) - (\partial G_{j_k}(\tilde{x}))^\top \nabla F_{i_k}(\tilde{G}) \right\|^2 \\
&\stackrel{(23)}{\leq} 2\mathbb{E} \|\nabla f(\tilde{x})\|^2 + 4 \underbrace{\mathbb{E} \left\| (\partial G_{j_k}(x_k))^\top \nabla F_{i_k}(\hat{G}_k) - (\partial G_{j_k}(x_k))^\top \nabla F_{i_k}(G(x_k)) \right\|^2}_{\text{the same as } T_4} \\
&\quad + 4 \underbrace{\mathbb{E} \left\| (\partial G_{j_k}(x_k))^\top \nabla F_{i_k}(G(x_k)) - (\partial G_{j_k}(\tilde{x}))^\top \nabla F_{i_k}(\tilde{G}) \right\|^2}_{=: T_5} \\
&\stackrel{(19)}{\leq} 2\mathbb{E} \|\nabla f(\tilde{x})\|^2 + 4B_G^2 L_F^2 T_0 + 4T_5. \tag{24}
\end{aligned}$$

To bound  $T_5$ , we simply use the Lipschitzian condition (10)

$$\begin{aligned}
T_5 &= \mathbb{E} \left\| (\partial G_{j_k}(x_k))^\top \nabla F_{i_k}(g(x_k)) - (\partial G_{j_k}(\tilde{x}))^\top \nabla F_{i_k}(\tilde{G}) \right\|^2 \\
&\stackrel{(10)}{\leq} L_f^2 \mathbb{E} \|x_k - \tilde{x}\|^2,
\end{aligned}$$

Put this bound back to (24) we obtain

$$T_2 \stackrel{(24)}{\leq} 2\mathbb{E} \|\nabla f(\tilde{x})\|^2 + 4B_G^2 L_F^2 T_0 + 4L_f^2 \mathbb{E} \|x_k - \tilde{x}\|^2. \tag{25}$$

Now we have  $T_2$  bounded, and we put this bound back to (22).

$$\begin{aligned}
\mathbb{E} \|x_{k+1} - x^*\|^2 &\stackrel{(22)}{\leq} \mathbb{E} \|x_k - x^*\|^2 - \frac{7\mu_f \gamma}{4} \mathbb{E} \|x_k - x^*\|^2 + \frac{16\gamma B_G^2 L_F^2}{\mu_f} T_0 + \gamma^2 T_2 \\
&\stackrel{(25)}{\leq} \mathbb{E} \|x_k - x^*\|^2 - \frac{7\mu_f \gamma}{4} \mathbb{E} \|x_k - x^*\|^2 + \frac{16\gamma B_G^2 L_F^2}{\mu_f} T_0 \\
&\quad + 2\gamma^2 \mathbb{E} \|\nabla f(\tilde{x})\|^2 + 4\gamma^2 B_G^2 L_F^2 T_0 + 4\gamma^2 L_f^2 \mathbb{E} \|x_k - \tilde{x}\|^2 \\
&\stackrel{(11)}{=} \mathbb{E} \|x_k - x^*\|^2 - \frac{7\mu_f \gamma}{4} \mathbb{E} \|x_k - x^*\|^2 + 2\gamma^2 L_f^2 \mathbb{E} \|\tilde{x} - x^*\|^2 \\
&\quad + \left( \frac{16\gamma B_G^2 L_F^2}{\mu_f} + 4\gamma^2 B_G^2 L_F^2 \right) T_0 + 4\gamma^2 L_f^2 \mathbb{E} \|x_k - \tilde{x}\|^2, \tag{26}
\end{aligned}$$

where the last step comes from (11) by letting  $x = x_k$  and  $y = x^*$ .

There is still one term,  $T_0$ , not bounded. We now start to bound it. From the definition of  $T_0$  in (19):

$$\begin{aligned}
T_0 &= \mathbb{E} \left\| \tilde{G} - \frac{1}{A} \sum_{1 \leq j \leq A} (G_{\mathcal{A}_k[j]}(\tilde{x}) - G_{\mathcal{A}_k[j]}(x_k)) - G(x_k) \right\|^2 \\
&= \mathbb{E} \left\| \frac{1}{A} \sum_{1 \leq j \leq A} (G_{\mathcal{A}_k[j]}(\tilde{x}) - G_{\mathcal{A}_k[j]}(x_k)) - (\tilde{G} - G(x_k)) \right\|^2
\end{aligned}$$

$$\begin{aligned}
&= \frac{1}{A^2} \mathbb{E} \left\| \sum_{1 \leq j \leq A} ((G_{\mathcal{A}_k[j]}(\tilde{x}) - G_{\mathcal{A}_k[j]}(x_k)) - (\tilde{G} - G(x_k))) \right\|^2 \\
&= \frac{1}{A^2} \sum_{1 \leq j \leq A} \mathbb{E} \| (G_{\mathcal{A}_k[j]}(\tilde{x}) - G_{\mathcal{A}_k[j]}(x_k)) - (\tilde{G} - G(x_k)) \|^2,
\end{aligned}$$

where the last step comes from the fact that the indices in  $\mathcal{A}_k$  are independent. Specifically,

$$\begin{aligned}
&\mathbb{E} \left\| \sum_{1 \leq j \leq A} (G_{\mathcal{A}_k[j]}(\tilde{x}) - G_{\mathcal{A}_k[j]}(x_k) - \tilde{G} + G(x_k)) \right\|^2 \\
&= \mathbb{E} \sum_{1 \leq j \leq A} \| (G_{\mathcal{A}_k[j]}(\tilde{x}) - G_{\mathcal{A}_k[j]}(x_k) - \tilde{G} + G(x_k)) \|^2 \\
&\quad + 2 \mathbb{E} \sum_{1 \leq j' < j \leq A} \langle (G_{\mathcal{A}_k[j]}(\tilde{x}) - G_{\mathcal{A}_k[j]}(x_k) - \tilde{G} + G(x_k)), (G_{\mathcal{A}_k[j']}(\tilde{x}) - G_{\mathcal{A}_k[j']}(x_k) - \tilde{G} + G(x_k)) \rangle \\
&= \mathbb{E} \sum_{1 \leq j \leq A} \| (G_{\mathcal{A}_k[j]}(\tilde{x}) - G_{\mathcal{A}_k[j]}(x_k) - \tilde{G} + G(x_k)) \|^2 \\
&\quad + 2 \mathbb{E} \sum_{1 \leq j' < j \leq A} \langle \mathbb{E}_{\mathcal{A}_k[j]} (G_{\mathcal{A}_k[j]}(\tilde{x}) - G_{\mathcal{A}_k[j]}(x_k) - \tilde{G} + G(x_k)), (G_{\mathcal{A}_k[j']}(\tilde{x}) - G_{\mathcal{A}_k[j']}(x_k) - \tilde{G} + G(x_k)) \rangle \\
&= \mathbb{E} \sum_{1 \leq j \leq A} \| (G_{\mathcal{A}_k[j]}(\tilde{x}) - G_{\mathcal{A}_k[j]}(x_k) - \tilde{G} + G(x_k)) \|^2 \\
&\quad + 2 \mathbb{E} \sum_{1 \leq j' < j \leq A} \langle 0, (G_{\mathcal{A}_k[j']}(\tilde{x}) - G_{\mathcal{A}_k[j']}(x_k) - \tilde{G} + G(x_k)) \rangle \\
&= \mathbb{E} \sum_{1 \leq j \leq A} \| (G_{\mathcal{A}_k[j]}(\tilde{x}) - G_{\mathcal{A}_k[j]}(x_k) - \tilde{G} + G(x_k)) \|^2. \tag{27}
\end{aligned}$$

Finally  $T_0$  can be bounded by

$$\begin{aligned}
T_0 &= \frac{1}{A^2} \sum_{1 \leq j \leq A} \mathbb{E} \| (G_{\mathcal{A}_k[j]}(\tilde{x}) - G_{\mathcal{A}_k[j]}(x_k)) - (\tilde{G} - G(x_k)) \|^2 \\
&\stackrel{(23)}{\leq} \frac{4}{A^2} \sum_{1 \leq j \leq A} \mathbb{E} \left( \| G_{\mathcal{A}_k[j]}(\tilde{x}) - G_{\mathcal{A}_k[j]}(x^*) \|^2 + \| G_{\mathcal{A}_k[j]}(x_k) - G_{\mathcal{A}_k[j]}(x^*) \|^2 \right. \\
&\quad \left. + \| \tilde{G} - G(x^*) \|^2 + \| G(x_k) - G(x^*) \|^2 \right) \\
&\stackrel{(7)}{\leq} \frac{8B_G^2}{A^2} \sum_{1 \leq j \leq A} \mathbb{E} (\| \tilde{x} - x^* \|^2 + \| x_k - x^* \|^2) \\
&= \frac{8B_G^2}{A} \mathbb{E} (\| \tilde{x} - x^* \|^2 + \| x_k - x^* \|^2). \tag{28}
\end{aligned}$$

By passing this bound to (26) we finally get all  $T$  terms bounded:

$$\mathbb{E} \| x_{k+1} - x^* \|^2$$

$$\begin{aligned}
&\stackrel{(26)}{\leq} \mathbb{E}\|x_k - x^*\|^2 - \frac{7\mu_f\gamma}{4}\mathbb{E}\|x_k - x^*\|^2 + 2\gamma^2L_f^2\mathbb{E}\|\tilde{x} - x^*\|^2 \\
&\quad + \left(\frac{16\gamma B_G^2L_F^2}{\mu_f} + 4\gamma^2B_G^2L_F^2\right)T_0 + 4\gamma^2L_f^2\mathbb{E}\|x_k - \tilde{x}\|^2 \\
&\stackrel{(28)}{\leq} \mathbb{E}\|x_k - x^*\|^2 - \frac{7\mu_f\gamma}{4}\mathbb{E}\|x_k - x^*\|^2 + 2\gamma^2L_f^2\mathbb{E}\|\tilde{x} - x^*\|^2 \\
&\quad + \left(\frac{16\gamma B_G^2L_F^2}{\mu_f} + 4\gamma^2B_G^2L_F^2\right)\frac{8B_G^2}{A}\mathbb{E}(\|\tilde{x} - x^*\|^2 + \|x_k - x^*\|^2) + 4\gamma^2L_f^2\mathbb{E}\|x_k - x^* + x^* - \tilde{x}\|^2 \\
&\stackrel{(23)}{\leq} \mathbb{E}\|x_k - x^*\|^2 - \frac{7\mu_f\gamma}{4}\mathbb{E}\|x_k - x^*\|^2 + 2\gamma^2L_f^2\mathbb{E}\|\tilde{x} - x^*\|^2 \\
&\quad + \left(\frac{16\gamma B_G^2L_F^2}{\mu_f} + 4\gamma^2B_G^2L_F^2\right)\frac{8B_G^2}{A}\mathbb{E}(\|\tilde{x} - x^*\|^2 + \|x_k - x^*\|^2) \\
&\quad + 8\gamma^2L_f^2\mathbb{E}(\|x_k - x^*\|^2 + \|\tilde{x} - x^*\|^2) \\
&= \mathbb{E}\|x_k - x^*\|^2 \\
&\quad - \left(\frac{7\mu_f\gamma}{4} - \left(\frac{16\gamma B_G^2L_F^2}{\mu_f} + 4\gamma^2B_G^2L_F^2\right)\frac{8B_G^2}{A} - 8\gamma^2L_f^2\right)\mathbb{E}\|x_k - x^*\|^2 \\
&\quad + \left(\left(\frac{16\gamma B_G^2L_F^2}{\mu_f} + 4\gamma^2B_G^2L_F^2\right)\frac{8B_G^2}{A} + 10\gamma^2L_f^2\right)\mathbb{E}\|\tilde{x} - x^*\|^2.
\end{aligned}$$

Summing this inequality from  $k = 0$  to  $k = K - 1$ , we obtain

$$\begin{aligned}
&\mathbb{E}\|x_{k+K} - x^*\|^2 \\
&\leq \mathbb{E}\|\tilde{x} - x^*\|^2 \\
&\quad - \left(\frac{7\mu_f\gamma}{4} - \left(\frac{16\gamma B_G^2L_F^2}{\mu_f} + 4\gamma^2B_G^2L_F^2\right)\frac{8B_G^2}{A} - 8\gamma^2L_f^2\right)\sum_{k=0}^{K-1}\mathbb{E}\|x_k - x^*\|^2 \\
&\quad + K\left(\left(\frac{16\gamma B_G^2L_F^2}{\mu_f} + 4\gamma^2B_G^2L_F^2\right)\frac{8B_G^2}{A} + 10\gamma^2L_f^2\right)\mathbb{E}\|\tilde{x} - x^*\|^2.
\end{aligned}$$

Discarding the left hand side, we complete the proof by

$$\begin{aligned}
&\frac{1}{K}\sum_{k=0}^{K-1}\mathbb{E}\|x_k - x^*\|^2 \\
&\leq \frac{\frac{1}{K} + \left(\frac{16\gamma B_G^2L_F^2}{\mu_f} + 4\gamma^2B_G^2L_F^2\right)\frac{8B_G^2}{A} + 10\gamma^2L_f^2}{\frac{7\mu_f\gamma}{4} - \left(\frac{16\gamma B_G^2L_F^2}{\mu_f} + 4\gamma^2B_G^2L_F^2\right)\frac{8B_G^2}{A} - 8\gamma^2L_f^2}\mathbb{E}\|\tilde{x} - x^*\|^2.
\end{aligned}$$

□

### Proof to Corollary 1

*Proof.* To appropriately choose  $\gamma, K$  and  $A$  in Algorithm 2, the key is to ensure the coefficient  $\frac{\beta_1}{\beta_2} < 1$  in Theorem 1:

$$\frac{\beta_1}{\beta_2} = \frac{\frac{1}{K} + \left(\frac{16\gamma B_G^2L_F^2}{\mu_f} + 4\gamma^2B_G^2L_F^2\right)\frac{8B_G^2}{A} + 10\gamma^2L_f^2}{\frac{7\mu_f\gamma}{4} - \left(\frac{16\gamma B_G^2L_F^2}{\mu_f} + 4\gamma^2B_G^2L_F^2\right)\frac{8B_G^2}{A} - 8\gamma^2L_f^2}.$$

We choose  $A$  satisfying both

$$\begin{aligned} 4\gamma^2 B_G^2 L_F^2 \frac{8B_G^2}{A} &\leq \frac{\mu_f \gamma}{4}, \\ \frac{16\gamma B_G^2 L_F^2}{\mu_f} \frac{8B_G^2}{A} &\leq \frac{\mu_f \gamma}{4}, \end{aligned}$$

which is equivalent to

$$A \geq \max \left\{ \frac{128\gamma B_G^4 L_F^2}{\mu_f}, \frac{512B_G^4 L_F^2}{\mu_f^2} \right\}.$$

We choose  $\gamma$  satisfying

$$8\gamma^2 L_f^2 \leq \frac{\mu_f \gamma}{4},$$

which is equivalent to

$$\gamma \leq \frac{\mu_f}{32L_f^2}.$$

It follows that

$$\begin{aligned} &\frac{\frac{1}{K} + \left( \frac{16\gamma B_G^2 L_F^2}{\mu_f} + 4\gamma^2 B_G^2 L_F^2 \right) \frac{8B_G^2}{A} + 10\gamma^2 L_f^2}{\frac{7\mu_f \gamma}{4} - \left( \frac{16\gamma B_G^2 L_F^2}{\mu_f} + 4\gamma^2 B_G^2 L_F^2 \right) \frac{8B_G^2}{A} - 8\gamma^2 L_f^2} \\ &\leq \frac{\frac{1}{K} + \frac{13\mu_f \gamma}{16}}{\mu_f \gamma} \\ &= \frac{13}{16} + \frac{1}{K\mu_f \gamma}. \end{aligned}$$

We then choose  $K$  satisfying

$$\frac{1}{K\mu_f \gamma} \leq \frac{1}{16},$$

which is equivalent to

$$K \geq \frac{16}{\mu_f \gamma}.$$

Thus choosing  $\gamma$ ,  $A$ , and  $K$  appropriately in the following to satisfy all conditions derived above

$$\begin{aligned} \gamma &= \frac{\mu_f}{32L_f^2}, \\ A &= \frac{512B_G^4 L_F^2}{\mu_f^2}, \\ K &= \frac{512L_f^2}{\mu_f^2}, \end{aligned}$$

we obtain a linear convergence rate of coefficient  $\frac{\beta_1}{\beta_2} = \frac{7}{8}$  from Theorem 1.  $\square$

**Lemma 1.** *Under the assumption in (10), we have*

$$\frac{1}{n} \sum_{i=1}^n \left\| \frac{1}{m} \sum_{j=1}^m (\partial G_j(x))^\top \nabla F_i(G(x)) - \frac{1}{m} \sum_{j=1}^m (\partial G_j(x^*))^\top \nabla F_i(G(x^*)) \right\|^2 \leq 2L_f(f(x) - f^*).$$

*Proof.* Recall that at the optimal point we always have

$$f'(x^*) = \frac{1}{mn} \sum_{i=1}^n \sum_{j=1}^m (\partial G_j(x^*))^\top \nabla F_i(G(x^*)) = 0. \quad (29)$$

We can derive the Lipschitz constant of  $F_i(G(x))$  from (10)

$$\begin{aligned} & \|\nabla F_i(G(x)) - \nabla F_i(G(y))\| \\ &= \frac{1}{m} \left\| \sum_j (\partial G_j(x))^\top \nabla F_i(G(x)) - \sum_j (\partial G_j(y))^\top \nabla F_i(G(y)) \right\| \\ &\leq \frac{1}{m} \sum_j \|(\partial G_j(x))^\top \nabla F_i(G(x)) - (\partial G_j(y))^\top \nabla F_i(G(y))\| \\ &\leq L_f \|x - y\|, \forall i. \end{aligned} \quad (30)$$

From this Lipschitz condition, we obtain

$$\begin{aligned} F_i(G(x)) &\stackrel{(30)}{\geq} F_i(G(x^*)) + \frac{1}{m} \left\langle \sum_{j=1}^m (\partial G_j(x^*))^\top \nabla F_i(G(x^*)), x - x^* \right\rangle \\ &\quad + \frac{1}{2L_f} \left\| \frac{1}{m} \sum_{j=1}^m (\partial G_j(x))^\top \nabla F_i(x) - \frac{1}{m} \sum_{j=1}^m (\partial G_j(x^*))^\top \nabla F_i(x^*) \right\|^2. \end{aligned}$$

Summing from  $i = 1$  to  $i = n$ , using (29) and noting that  $\frac{1}{n} \sum_{i=1}^n F_i(G(x)) = f(x)$ , we obtain

$$\frac{1}{n} \sum_{i=1}^n \left\| \frac{1}{m} \sum_{j=1}^m (\partial G_j(x))^\top \nabla F_i(x) - \frac{1}{m} \sum_{j=1}^m (\partial G_j(x^*))^\top \nabla F_i(x^*) \right\|^2 \leq 2L_f(f(x) - f^*),$$

completing the proof.  $\square$

## Proof to Theorem 2

*Proof.* Note that in this proof we redefine the terms  $T_1, T_2, \dots$ , and they may not refer to the same expressions in the proof of Theorem 1. From

$$x_{k+1} - x_k = -\gamma((\hat{G}'_k)^\top \nabla F_{i_k}(\hat{G}_k) - (\tilde{G}')^\top \nabla F_{i_k}(\tilde{G}) + \tilde{f}').$$

we immediately obtain

$$\mathbb{E}\|x_{k+1} - x^*\|^2 = \mathbb{E}\|x_k - x^*\|^2 + \mathbb{E}\|x_{k+1} - x_k\|^2 + 2\mathbb{E}\langle x_{k+1} - x_k, x_k - x^* \rangle$$

$$\begin{aligned}
&= \mathbb{E}\|x_k - x^*\|^2 + \gamma^2 \mathbb{E}\|(\hat{G}'_k)^\top \nabla F_{i_k}(\hat{G}_k) - (\tilde{G}')^\top \nabla F_{i_k}(\tilde{G}) + \tilde{f}'\|^2 \\
&\quad - 2\gamma \mathbb{E}\langle (\hat{G}'_k)^\top \nabla F_{i_k}(\hat{G}_k) - (\tilde{G}')^\top \nabla F_{i_k}(\tilde{G}) + \tilde{f}', x_k - x^* \rangle.
\end{aligned}$$

Note that the last term can be simplified:

$$\begin{aligned}
&\mathbb{E}\langle (\hat{G}'_k)^\top \nabla F_{i_k}(\hat{G}_k) - (\tilde{G}')^\top \nabla F_{i_k}(\tilde{G}) + \tilde{f}', x_k - x^* \rangle \\
&= \mathbb{E}\langle (\hat{G}'_k)^\top \nabla F_{i_k}(\hat{G}_k) - \mathbb{E}_{i_k}(\tilde{G}')^\top \nabla F_{i_k}(\tilde{G}) + \tilde{f}', x_k - x^* \rangle \\
&= \mathbb{E}\langle (\hat{G}'_k)^\top \nabla F_{i_k}(\hat{G}_k) - \tilde{f}' + \tilde{f}', x_k - x^* \rangle \\
&= \mathbb{E}\langle (\hat{G}'_k)^\top \nabla F_{i_k}(\hat{G}_k), x_k - x^* \rangle.
\end{aligned}$$

Therefore, we have

$$\begin{aligned}
\mathbb{E}\|x_{k+1} - x^*\|^2 &= \mathbb{E}\|x_k - x^*\|^2 - 2\gamma \underbrace{\mathbb{E}\langle (\hat{G}'_k)^\top \nabla F_{i_k}(\hat{G}_k), x_k - x^* \rangle}_{=:T_1} \\
&\quad + \gamma^2 \underbrace{\mathbb{E}\|(\hat{G}'_k)^\top \nabla F_{i_k}(\hat{G}_k) - (\tilde{G}')^\top \nabla F_{i_k}(\tilde{G}) + \tilde{f}'\|^2}_{=:T_2}. \tag{31}
\end{aligned}$$

First we estimate the lower bound for  $T_1$ :

$$\begin{aligned}
T_1 &= \mathbb{E}\langle (\hat{G}'_k)^\top \nabla F_{i_k}(\hat{G}_k), x_k - x^* \rangle \\
&= \underbrace{\mathbb{E}\langle (\hat{G}'_k)^\top \nabla F_{i_k}(\hat{G}_k) - \nabla f(x_k), x_k - x^* \rangle}_{=:T_3} + \mathbb{E}\langle \nabla f(x_k), x_k - x^* \rangle \\
&\geq T_3 + \mathbb{E}(f(x_k) - f^*). \tag{32}
\end{aligned}$$

Then we estimate the lower bound for  $T_3$

$$\begin{aligned}
T_3 &= \mathbb{E}\langle (\hat{G}'_k)^\top \nabla F_{i_k}(\hat{G}_k) - \nabla f(x_k), x_k - x^* \rangle \\
&= \mathbb{E}\left\langle (\partial G_{j_k}(x_k))^\top \nabla F_{i_k}(\hat{G}_k) - (\partial G_{j_k}(x_k))^\top \nabla F_{i_k}(G(x_k)), x_k - x^* \right\rangle,
\end{aligned}$$

where  $j_k$  is a new (imaginary) random variable that is chosen uniformly randomly from  $\{1, \dots, m\}$  and is independent of other random variables.  $\mathbb{E}$  also takes expectation on  $j_k$ . Thus using the same technique as we use in (18) while proving Theorem 1, we obtain

$$T_3 \geq -\frac{1}{\alpha} \underbrace{\mathbb{E}\|(\partial G_{j_k}(x_k))^\top \nabla F_{i_k}(\hat{G}_k) - (\partial G_{j_k}(x_k))^\top \nabla F_{i_k}(G(x_k))\|^2}_{=:T_4} - \alpha \mathbb{E}\|x_k - x^*\|^2, \forall \alpha > 0.$$

and

$$\begin{aligned}
T_4 &= \mathbb{E}\|(\partial G_{j_k}(x_k))^\top \nabla F_{i_k}(\hat{G}_k) - (\partial G_{j_k}(x_k))^\top \nabla F_{i_k}(G(x_k))\|^2 \\
&\stackrel{(19)}{\leq} B_G^2 L_F^2 T_0,
\end{aligned}$$

where

$$T_0 := \mathbb{E} \left\| \tilde{G} - \frac{1}{A} \sum_{1 \leq j \leq A} (G_{\mathcal{A}_k[j]}(\tilde{x}) - G_{\mathcal{A}_k[j]}(x_k)) - G(x_k) \right\|^2.$$



Let  $\alpha = \frac{\mu_f}{8}$ , we obtain

$$T_3 \geq -\frac{8B_G^2 L_F^2}{\mu_f} T_0 - \frac{\mu_f}{8} \mathbb{E} \|x_k - x^*\|^2.$$

Put the bound of  $T_3$  into (32) and note that

$$\mu_f \|x_k - x^*\|^2 \leq 2(f(x_k) - f^*). \quad (33)$$

We obtain

$$\begin{aligned} T_1 &\geq -\frac{8B_G^2 L_F^2}{\mu_f} T_0 - \frac{\mu_f}{8} \mathbb{E} \|x_k - x^*\|^2 + \mathbb{E}(f(x_k) - f^*) \\ &\stackrel{(33)}{\geq} -\frac{8B_G^2 L_F^2}{\mu_f} T_0 + \frac{3}{4} \mathbb{E}(f(x_k) - f^*). \end{aligned} \quad (34)$$

Now we have  $T_1$  bounded. We then start to bound  $T_2$ . From the definition of  $T_2$  we have

$$\begin{aligned} T_2 &= \mathbb{E} \|(\hat{G}'_k)^\top \nabla F_{i_k}(\hat{G}_k) - (\tilde{G}')^\top \nabla F_{i_k}(\tilde{G}) + \tilde{f}'\|^2 \\ &\stackrel{(23)}{\leq} 2\mathbb{E} \|\tilde{f}'\|^2 + 2\mathbb{E} \|(\hat{G}'_k)^\top \nabla F_{i_k}(\hat{G}_k) - (\tilde{G}')^\top \nabla F_{i_k}(\tilde{G})\|^2 \\ &= 2\mathbb{E} \|\tilde{f}'\|^2 + 2\mathbb{E} \left\| (\hat{G}'_k)^\top \nabla F_{i_k}(\hat{G}_k) - \frac{1}{m} \sum_{j=1}^m (\partial G_j(x_k))^\top \nabla F_{i_k}(G(x_k)) \right. \\ &\quad \left. + \frac{1}{m} \sum_{j=1}^m (\partial G_j(x_k))^\top \nabla F_{i_k}(G(x_k)) - (\tilde{G}')^\top \nabla F_{i_k}(\tilde{G}) \right\|^2 \\ &\stackrel{(23)}{\leq} 2\mathbb{E} \|\tilde{f}'\|^2 + 4\mathbb{E} \left\| (\hat{G}'_k)^\top \nabla F_{i_k}(\hat{G}_k) - \frac{1}{m} \sum_{j=1}^m (\partial G_j(x_k))^\top \nabla F_{i_k}(G(x_k)) \right\|^2 \\ &\quad + 4\mathbb{E} \left\| \frac{1}{m} \sum_{j=1}^m (\partial G_j(x_k))^\top \nabla F_{i_k}(G(x_k)) - (\tilde{G}')^\top \nabla F_{i_k}(\tilde{G}) \right\|^2 \\ &\stackrel{(23)}{\leq} 2\mathbb{E} \|\tilde{f}'\|^2 + 4\mathbb{E} \left\| (\hat{G}'_k)^\top \nabla F_{i_k}(\hat{G}_k) - \frac{1}{m} \sum_{j=1}^m (\partial G_j(x_k))^\top \nabla F_{i_k}(G(x_k)) \right\|^2 \\ &\quad + 8\mathbb{E} \left\| \frac{1}{m} \sum_{j=1}^m (\partial G_j(x_k))^\top \nabla F_{i_k}(G(x_k)) - \frac{1}{m} \sum_{j=1}^m (\partial G_j(x^*))^\top \nabla F_{i_k}(G(x^*)) \right\|^2 \\ &\quad + 8\mathbb{E} \left\| (\tilde{G}')^\top \nabla F_{i_k}(\tilde{G}) - \frac{1}{m} \sum_{j=1}^m (\partial G_j(x^*))^\top \nabla F_{i_k}(G(x^*)) \right\|^2 \\ &\leq 4L_f \mathbb{E}(f(\tilde{x}) - f^*) + 4\mathbb{E} \underbrace{\left\| (\hat{G}'_k)^\top \nabla F_{i_k}(\hat{G}_k) - \frac{1}{m} \sum_{j=1}^m (\partial G_j(x_k))^\top \nabla F_{i_k}(G(x_k)) \right\|^2}_{=: T_5} \end{aligned} \quad (35)$$

$$+16(L_f\mathbb{E}(f(\tilde{x}) - f^*) + L_f\mathbb{E}(f(x_k) - f^*)), \quad (36)$$

where the last step comes from Lemma 1 and  $\frac{\|\nabla f(\tilde{x})\|^2}{2L_f} \leq f(\tilde{x}) - f^*$ .

Note that  $T_5$  can be bounded by

$$\begin{aligned} T_5 &= \mathbb{E} \left\| (\hat{G}'_k)^\top \nabla F_{i_k}(\hat{G}_k) - \frac{1}{m} \sum_{j=1}^m (\partial G_j(x_k))^\top \nabla F_{i_k}(G(x_k)) \right\|^2 \\ &\stackrel{(23)}{\leq} 2\mathbb{E} \left\| (\hat{G}'_k)^\top \nabla F_{i_k}(\hat{G}_k) - \frac{1}{m} \sum_{j=1}^m (\partial G_j(x_k))^\top \nabla F_{i_k}(\hat{G}_k) \right\|^2 \\ &\quad + 2\mathbb{E} \left\| \frac{1}{m} \sum_{j=1}^m (\partial G_j(x_k))^\top \nabla F_{i_k}(G(x_k)) - \frac{1}{m} \sum_{j=1}^m (\partial G_j(x_k))^\top \nabla F_{i_k}(\hat{G}_k) \right\|^2 \\ &\stackrel{(12), (7)}{\leq} 2B_F^2 \mathbb{E} \left\| (\hat{G}'_k)^\top - \frac{1}{m} \sum_{j=1}^m (\partial G_j(x_k))^\top \right\|^2 + 2B_G^2 \mathbb{E} \|\nabla F_{i_k}(G(x_k)) - \nabla F_{i_k}(\hat{G}_k)\|^2 \\ &\leq 2B_F^2 \mathbb{E} \left\| (\tilde{G}')^\top - \frac{1}{B} \left( \sum_{1 \leq j \leq B} ((\partial G_{\mathcal{B}_k[j]}(\tilde{x}))^\top - (\partial G_{\mathcal{B}_k[j]}(x_k))^\top) \right) - \frac{1}{m} \sum_{j=1}^m (\partial G_j(x_k))^\top \right\|^2 \\ &\quad + 2B_G^2 L_F^2 \mathbb{E} \left\| \tilde{G} - \frac{1}{A} \sum_{1 \leq j \leq A} (G_{\mathcal{A}_k[j]}(\tilde{x}) - G_{\mathcal{A}_k[j]}(x_k)) - G(x_k) \right\|^2 \\ &= \frac{2B_F^2}{B^2} \mathbb{E} \left\| - \sum_{1 \leq j \leq B} \left( ((\partial G_{\mathcal{B}_k[j]}(\tilde{x}))^\top - (\partial G_{\mathcal{B}_k[j]}(x_k))^\top) - \left( (\tilde{G}')^\top - \frac{1}{m} \sum_{j=1}^m (\partial G_j(x_k))^\top \right) \right) \right\|^2 \\ &\quad + \frac{2B_G^2 L_F^2}{A^2} \mathbb{E} \left\| - \sum_{1 \leq j \leq A} ((G_{\mathcal{A}_k[j]}(\tilde{x}) - G_{\mathcal{A}_k[j]}(x_k)) - (G(x_k) - \tilde{G})) \right\|^2 \end{aligned}$$

Using the same technique as in (27), the above inequality continues as

$$\begin{aligned} &= \frac{2B_F^2}{B^2} \mathbb{E} \sum_{1 \leq j \leq B} \left\| (\partial G_{\mathcal{B}_k[j]}(x_k))^\top - (\partial G_{\mathcal{B}_k[j]}(\tilde{x}))^\top + \left( (\tilde{G}')^\top - \frac{1}{m} \sum_{j=1}^m (\partial G_j(x_k))^\top \right) \right\|^2 \\ &\quad + \frac{2B_G^2 L_F^2}{A^2} \mathbb{E} \sum_{1 \leq j \leq A} \|G_{\mathcal{A}_k[j]}(x_k) - G_{\mathcal{A}_k[j]}(\tilde{x}) + (G(x_k) - \tilde{G})\|^2 \\ &\stackrel{(7),(9),(23)}{\leq} \frac{2B_F^2}{B^2} \sum_{1 \leq j \leq B} 8L_G^2 (\mathbb{E}\|\tilde{x} - x^*\|^2 + \mathbb{E}\|x_k - x^*\|^2) \\ &\quad + \frac{2B_G^2 L_F^2}{A^2} \sum_{1 \leq j \leq A} 8B_G^2 (\mathbb{E}\|\tilde{x} - x^*\|^2 + \mathbb{E}\|x_k - x^*\|^2) \\ &= 16 \left( \frac{B_F^2 L_G^2}{B} + \frac{B_G^4 L_F^2}{A} \right) (\mathbb{E}\|\tilde{x} - x^*\|^2 + \mathbb{E}\|x_k - x^*\|^2) \end{aligned}$$

$$\leq \frac{32}{\mu_f} \left( \frac{B_F^2 L_G^2}{B} + \frac{B_G^4 L_F^2}{A} \right) (\mathbb{E}(f(\tilde{x}) - f^*) + \mathbb{E}(f(x_k) - f^*)).$$

Now we continue to bound  $T_2$  in (36) using the bound for  $T_5$  above:

$$\begin{aligned} T_2 &\stackrel{(36)}{\leq} 4L_f \mathbb{E}(f(\tilde{x}) - f^*) + 4T_5 + 16(L_f(f(\tilde{x}) - f^*) + L_f \mathbb{E}(f(x_k) - f^*)) \\ &= 20L_f \mathbb{E}(f(\tilde{x}) - f^*) + 16L_f \mathbb{E}(f(x_k) - f^*) + 4T_5 \\ &\leq 20L_f \mathbb{E}(f(\tilde{x}) - f^*) + 16L_f \mathbb{E}(f(x_k) - f^*) \\ &\quad + \frac{128}{\mu_f} \left( \frac{B_F^2 L_G^2}{B} + \frac{B_G^4 L_F^2}{A} \right) (\mathbb{E}(f(\tilde{x}) - f^*) + \mathbb{E}(f(x_k) - f^*)) \\ &= \left( \frac{128}{\mu_f} \left( \frac{B_F^2 L_G^2}{B} + \frac{B_G^4 L_F^2}{A} \right) + 16L_f \right) \mathbb{E}(f(x_k) - f^*) \\ &\quad + \left( \frac{128}{\mu_f} \left( \frac{B_F^2 L_G^2}{B} + \frac{B_G^4 L_F^2}{A} \right) + 20L_f \right) \mathbb{E}(f(\tilde{x}) - f^*). \end{aligned} \quad (37)$$

Now we have  $T_2$  bounded. Finally we put the bounds of  $T_2, T_1$  in (37) and (34) into (31) and note that using the same procedure in the proof of Theorem 1 (see (28)) we have

$$T_0 \leq \frac{8B_G^2}{A} \mathbb{E}(\|\tilde{x} - x^*\|^2 + \|x_k - x^*\|^2). \quad (38)$$

We obtain:

$$\begin{aligned} &\mathbb{E}\|x_{k+1} - x^*\|^2 \\ &\stackrel{(31)}{\leq} \mathbb{E}\|x_k - x^*\|^2 - 2\gamma T_1 + \gamma^2 T_2 \\ &\stackrel{(34),(37)}{\leq} \mathbb{E}\|x_k - x^*\|^2 - 2\gamma \left( -\frac{8B_G^2 L_F^2}{\mu_f} T_0 + \frac{3}{4} \mathbb{E}(f(x_k) - f^*) \right) \\ &\quad + \gamma^2 \left( \frac{128}{\mu_f} \left( \frac{B_F^2 L_G^2}{B} + \frac{B_G^4 L_F^2}{A} \right) + 16L_f \right) \mathbb{E}(f(x_k) - f^*) \\ &\quad + \gamma^2 \left( \frac{128}{\mu_f} \left( \frac{B_F^2 L_G^2}{B} + \frac{B_G^4 L_F^2}{A} \right) + 20L_f \right) \mathbb{E}(f(\tilde{x}) - f^*) \\ &\stackrel{(38)}{\leq} \mathbb{E}\|x_k - x^*\|^2 - 2\gamma \left( -\frac{8B_G^2 L_F^2}{\mu_f} \left( \frac{8B_G^2}{A} \mathbb{E}(\|\tilde{x} - x^*\|^2 + \|x_k - x^*\|^2) \right) + \frac{3}{4} \mathbb{E}(f(x_k) - f^*) \right) \\ &\quad + \gamma^2 \left( \frac{128}{\mu_f} \left( \frac{B_F^2 L_G^2}{B} + \frac{B_G^4 L_F^2}{A} \right) + 16L_f \right) \mathbb{E}(f(x_k) - f^*) \\ &\quad + \gamma^2 \left( \frac{128}{\mu_f} \left( \frac{B_F^2 L_G^2}{B} + \frac{B_G^4 L_F^2}{A} \right) + 20L_f \right) \mathbb{E}(f(\tilde{x}) - f^*) \\ &\stackrel{(33)}{\leq} \mathbb{E}\|x_k - x^*\|^2 - 2\gamma \left( -\frac{128B_G^4 L_F^2}{\mu_f^2 A} \mathbb{E}(f(\tilde{x}) - f^* + f(x_k) - f^*) + \frac{3}{4} \mathbb{E}(f(x_k) - f^*) \right) \\ &\quad + \gamma^2 \left( \frac{128}{\mu_f} \left( \frac{B_F^2 L_G^2}{B} + \frac{B_G^4 L_F^2}{A} \right) + 16L_f \right) \mathbb{E}(f(x_k) - f^*) \\ &\quad + \gamma^2 \left( \frac{128}{\mu_f} \left( \frac{B_F^2 L_G^2}{B} + \frac{B_G^4 L_F^2}{A} \right) + 20L_f \right) \mathbb{E}(f(\tilde{x}) - f^*) \end{aligned}$$

$$\begin{aligned}
&= \mathbb{E}\|x_k - x^*\|^2 \\
&\quad - \left( \frac{3\gamma}{2} - \frac{256\gamma B_G^4 L_F^2}{\mu_f^2 A} - \gamma^2 \left( \frac{128}{\mu_f} \left( \frac{B_F^2 L_G^2}{B} + \frac{B_G^4 L_F^2}{A} \right) + 16L_f \right) \right) \mathbb{E}(f(x_k) - f^*) \\
&\quad + \left( \frac{256\gamma B_G^4 L_F^2}{\mu_f^2 A} + \gamma^2 \left( \frac{128}{\mu_f} \left( \frac{B_F^2 L_G^2}{B} + \frac{B_G^4 L_F^2}{A} \right) + 20L_f \right) \right) \mathbb{E}(f(\tilde{x}) - f^*).
\end{aligned}$$

Summing from  $k = 0$  to  $k = K - 1$ , we obtain

$$\begin{aligned}
\mathbb{E}\|x_K - x^*\|^2 &\leq \mathbb{E}\|\tilde{x} - x^*\|^2 \\
&\quad - \left( \frac{3\gamma}{2} - \frac{256\gamma B_G^4 L_F^2}{\mu_f^2 A} - \gamma^2 \left( \frac{128}{\mu_f} \left( \frac{B_F^2 L_G^2}{B} + \frac{B_G^4 L_F^2}{A} \right) + 16L_f \right) \right) \sum_{k=0}^{K-1} \mathbb{E}(f(x_k) - f^*) \\
&\quad + \left( \frac{256\gamma B_G^4 L_F^2}{\mu_f^2 A} + \gamma^2 \left( \frac{128}{\mu_f} \left( \frac{B_F^2 L_G^2}{B} + \frac{B_G^4 L_F^2}{A} \right) + 20L_f \right) \right) K \mathbb{E}(f(\tilde{x}) - f^*).
\end{aligned}$$

Discarding the LHS and note that  $\|\tilde{x} - x^*\|^2 \leq \frac{2}{\mu_f} (f(\tilde{x}) - f^*)$ , we obtain

$$\frac{1}{K} \sum_{k=0}^{K-1} \mathbb{E}(f(x_k) - f^*) \leq \frac{\frac{2}{K\mu_f} + \frac{256\gamma B_G^4 L_F^2}{\mu_f^2 A} + \gamma^2 \left( \frac{128}{\mu_f} \left( \frac{B_F^2 L_G^2}{B} + \frac{B_G^4 L_F^2}{A} \right) + 20L_f \right)}{\frac{3\gamma}{2} - \frac{256\gamma B_G^4 L_F^2}{\mu_f^2 A} - \gamma^2 \left( \frac{128}{\mu_f} \left( \frac{B_F^2 L_G^2}{B} + \frac{B_G^4 L_F^2}{A} \right) + 16L_f \right)} \mathbb{E}(f(\tilde{x}) - f^*),$$

completing the proof.  $\square$

## Proof to Corollary 2

*Proof.* To appropriately choose parameters  $\gamma$ ,  $K$ ,  $A$ , and  $B$ , the key is to ensure the coefficient  $\frac{\beta_3}{\beta_4} < 1$  in Therom 2:

$$\frac{\beta_3}{\beta_4} = \frac{\frac{2}{K\mu_f} + \frac{256\gamma B_G^4 L_F^2}{\mu_f^2 A} + \gamma^2 \left( \frac{128}{\mu_f} \left( \frac{B_F^2 L_G^2}{B} + \frac{B_G^4 L_F^2}{A} \right) + 20L_f \right)}{\frac{3\gamma}{2} - \frac{256\gamma B_G^4 L_F^2}{\mu_f^2 A} - \gamma^2 \left( \frac{128}{\mu_f} \left( \frac{B_F^2 L_G^2}{B} + \frac{B_G^4 L_F^2}{A} \right) + 16L_f \right)}.$$

We choose  $A$ ,  $B$ , and  $\gamma$  satisfying (39), (40), (41), and (42):

$$\frac{256\gamma B_G^4 L_F^2}{\mu_f^2 A} \leq \frac{\gamma}{4} \tag{39}$$

$$\Rightarrow A \geq \frac{1024 B_G^4 L_F^2}{\mu_f^2}$$

$$\gamma^2 \frac{128}{\mu_f} \frac{B_F^2 L_G^2}{B} \leq \frac{\gamma}{16} \tag{40}$$

$$\Rightarrow B \geq \gamma \frac{2048}{\mu_f} B_F^2 L_G^2$$

$$\gamma^2 \frac{128}{\mu_f} \frac{B_G^4 L_F^2}{A} \leq \frac{\gamma}{16} \tag{41}$$

$$\begin{aligned}
\Rightarrow A &\geq \gamma \frac{2048}{\mu_f} B_G^4 L_F^2 \\
20\gamma^2 L_f &\leq \frac{\gamma}{16} \\
\Rightarrow \gamma &\leq \frac{1}{320L_f}.
\end{aligned} \tag{42}$$

Then we have the following bound on the coefficient

$$\begin{aligned}
\nu &= \frac{\frac{2}{K\mu_f} + \frac{256\gamma B_G^4 L_F^2}{\mu_f A} + \gamma^2 \left( \frac{128}{\mu_f} \left( \frac{B_F^2 L_G^2}{B} + \frac{B_G^4 L_F^2}{A} \right) + 20L_f \right)}{\frac{3\gamma}{2} - \frac{256\gamma B_G^4 L_F^2}{\mu_f A} - \gamma^2 \left( \frac{128}{\mu_f} \left( \frac{B_F^2 L_G^2}{B} + \frac{B_G^4 L_F^2}{A} \right) + 16L_f \right)} \\
&\leq \frac{\frac{2}{K\mu_f} + \frac{\gamma}{4} + \frac{3\gamma}{16}}{\frac{3\gamma}{2} - \frac{\gamma}{4} - \frac{3\gamma}{16}} \\
&= \frac{\frac{2}{K\mu_f} + \frac{7\gamma}{16}}{\frac{17\gamma}{16}} \\
&= \frac{32}{17K\mu_f\gamma} + \frac{7}{17}.
\end{aligned}$$

We then choose  $K$  satisfying

$$\frac{32}{17K\mu_f\gamma} \leq \frac{2}{17},$$

which is equivalent to

$$K \geq \frac{16}{\mu_f\gamma}.$$

Thus choosing  $\gamma$ ,  $A$ , and  $K$  appropriately in the following to satisfy all conditions derived above

$$\begin{aligned}
\gamma &= \frac{1}{320L_f} \\
K &\geq \frac{16}{\mu_f\gamma} = \frac{5120L_f}{\mu_f} \\
A &\geq \max \left\{ \frac{1024B_G^4 L_F^2}{\mu_f^2}, \gamma \frac{2048}{\mu_f} B_G^4 L_F^2 \right\} = \max \left\{ \frac{1024B_G^4 L_F^2}{\mu_f^2}, \frac{32B_G^4 L_F^2}{5\mu_f L_f} \right\} \\
B &\geq \gamma \frac{2048}{\mu_f} B_F^2 L_G^2 = \frac{32B_F^2 L_G^2}{5\mu_f L_f},
\end{aligned}$$

we will obtain a  $9/17$  linear convergence rate with  $\frac{\beta_3}{\beta_4} = \frac{9}{17}$  from Theorem 2.  $\square$
